# Supplementary material
Source: publisher figshare collection journal article supplement (https://sage.figshare.com/ndownloader/files/21819297)
Supplement: Supplementary file 1 [file 21819297]

Table 5 (Supplementary File).

*Meta-Regression of the Moderator Analysis on Social Studies Intervention Mean Effect Sizes (n = 115; k = 33)*

| Study Characteristic | *B* | *SE* | *df* | *p* | 95% CI |  |
| --- | --- | --- | --- | --- | --- | --- |
| Publication year  Before 2005 vs. 2005 or after | -0.04 | 0.30 | 13.00 | .90 | [-0.69, 0.62] | 0.48 |
| Grade  K-8 vs. 9-12 | 0.37 | 0.28 | 9.98 | .21 | [-0.25, 0.99] |
| Design  RCT vs. Quasi-experimental | -0.14 | 0.22 | 14.63 | .53 | [-0.62, 0.33] |
| Implementer  Researcher vs. Teacher | -0.34 | 0.42 | 11.74 | .43 | [-1.25, 0.57] |
| Group Sizea  1:1 or 2-5 group vs. 6+ group | 0.22 | 0.29 | 10.44 | .47 | [-0.42, 0.85] |
| Total Sessionsb  <10 vs. ≥10 | -0.12 | .26 | 12.74 | .65 | [-0.69, 0.45] |

*Note. n* = number of effect sizes*; k* = number of studies; *SE* = standard error; *df* = degrees of freedom; CI = confidence interval; = between-study variance; RCT = Randomized Control Trial; Ed. = Education. Bolded B values indicate statistically significant estimates at p < .05.

aStudies that did not report group size were coded as 6+ group.

bStudies that did not report the number of sessions were coded as <10 sessions.
